# Supplementary material
Source: HighWire-hosted journal article supplement (https://www.jrheum.org/highwire/filestream/38260/field_highwire_adjunct_files/0/190313DataSuppl.pdf)
Supplement: 190313DataSuppl.pdf [file 190313DataSuppl.pdf]

## ONLINE SUPPLEMENTARY DATA

**Supplementary Table 1. Patients' baseline characteristics at AAV diagnosis according to AAV subtypes and ANCA specificity**

|                                                                | MPA<br>(n=27) | GPA<br>(n=27) | EGPA<br>(n=7) | P                | MPO<br>(n=39)     | PR3<br>(n=13)    | Negative<br>(n=5) | Other<br>(n=6) | p-value      |
|----------------------------------------------------------------|---------------|---------------|---------------|------------------|-------------------|------------------|-------------------|----------------|--------------|
| <b>Median age at AAV diagnosis, years, [IQR]</b>               | 67 [59-77]    | 62 [49-73]    | 57 [43-76]    | 0.26             | 67 [55-76]        | 65 [60-70]       | 49 [45-57]        | 46 [27-73]     | 0.06         |
| <b>Sex (male), n (%)</b>                                       | 6 (22)        | 8 (30)        | 2 (29)        | 0.8              | 11 (28)           | 3 (23)           | 1 (20)            | 1 (17)         | 1            |
| <b>Tabaco users, n (%) (N=56)</b>                              | 8 (30)        | 8 (36)        | 3 (43)        | 0.8              | 12 (32)           | 5 (56)           | 2 (40)            | 0 (0)          | 0.3          |
| <b>Prior autoimmune disease</b>                                | 8 (30)        | 4 (15)        | 0 (0)         | 0.2              | 10 (26)           | 2 (16)           | 0 (0)             | (0)            | 0.5          |
| <b>Median duration between B and AAV diagnoses, year [IQR]</b> | 13 [3-54.5]   | 35 [16-48]    | 3 [3-3]       | 0.4              | 18.5 [3.75-56.75] | 19.5 [14.5-26.5] | -                 | 2 [2-2]        | 0.4          |
| <b>Median duration between AAV and B diagnoses, year [IQR]</b> | 0.5 [0-1]     | 5 [1.25-7.75] | 1 [0.25-3.25] | 0.04             | 1 [0-4]           | 4 [0-5]          | 1 [1-23]          | 6 [2.5-6]      | 0.8          |
| <b>AAV, n (%)</b>                                              |               |               |               |                  |                   |                  |                   |                | <0.001       |
| GPA                                                            | -             | -             | -             | -                | 11 (28)           | 13 (100)         | 1 (20)            | 2 (33.5)       |              |
| MPA                                                            | -             | -             | -             | -                | 25 (64)           | 0 (0)            | 0 (0)             | 4 (66.5)       |              |
| EGPA                                                           | -             | -             | -             | -                | 3 (8)             | 0 (0)            | 4 (80)            | 0 (0)          |              |
| <b>ANCA specificity, n (%)</b>                                 |               |               |               |                  |                   |                  |                   |                |              |
| MPO                                                            | 25 (93)       | 11 (41)       | 3 (43)        | <b>&lt;0.001</b> | -                 | -                | -                 | -              | -            |
| PR3                                                            | 0 (0)         | 13 (48)       | 0 (0)         | <b>&lt;0.001</b> | -                 | -                | -                 | -              | -            |
| Other*                                                         | 4 (15)        | 2 (7)         | 0(0)          | 0.3              | -                 | -                | -                 | -              | -            |
| Negative,                                                      | 0 (0)         | 1 (4)         | 4 (57)        | <b>&lt;0.001</b> | -                 | -                | -                 | -              | -            |
| <b>Symptoms and manifestations, n (%)</b>                      |               |               |               |                  |                   |                  |                   |                |              |
| Respiratory                                                    | 20 (74)       | 20 (74)       | 5 (71)        | 1                | 28 (72)           | 10 (77)          | 4 (80)            | 3 (50)         | 1            |
| ENT                                                            | 6 (22)        | 22 (81)       | 4 (57)        | <b>&lt;0.001</b> | 15 (38)           | 10 (77)          | 4 (80)            | 2 (33)         | <b>0.046</b> |
| Neurologic                                                     | 11 (41)       | 12 (44)       | 3 (43)        | 0.96             | 19 (49)           | 4 (31)           | 2 (40)            | 1 (17)         | 0.7          |
| Mononeuritis multiplex                                         | 10 (37)       | 10 (37)       | 3 (43)        | 0.96             | 17 (44)           | 3 (23)           | 2 (40)            | 1 (17)         | 0.96         |
| Renal                                                          | 10 (37)       | 10 (37)       | 1 (14)        | 0.96             | 15 (38)           | 6 (46)           | 0 (0)             | 0 (0)          | 0.14         |
| Proteinuria > 0.4 gm/24 hours                                  | 10 (37)       | 9 (33)        | 1 (14)        | 0.96             | 15 (38)           | 5 (38)           | 0 (0)             | 0 (0)          | 0.2          |

|                                   |           |            |            |              |          |          |         |        |      |
|-----------------------------------|-----------|------------|------------|--------------|----------|----------|---------|--------|------|
| Creatinine >140 $\mu$ moles/liter | 5 (18.5)  | 5 (18.5)   | 1 (14)     | 0.96         | 8 (20.5) | 3 (23)   | 0 (0)   | 0 (0)  | 0.7  |
| Myocarditis                       | 0 (0)     | 1 (4)      | 3 (43)     | <b>0.004</b> | 2 (5)    | 0 (0)    | 2 (40)  | 0 (0)  | 0.06 |
| <b>Median BVAS [IQR]</b>          | 11 [6-16] | 16 [10-20] | 14 [11-18] | 0.2          |          |          |         |        |      |
| <b>Median 1996 FFS [IQR]</b>      | 0 [0-1]   | 0 [0-1]    | 1 [0-1]    | 0.4          |          |          |         |        |      |
| <b>Treatments, n (%)</b>          |           |            |            |              |          |          |         |        |      |
| Corticosteroids                   | 27 (100)  | 26 (96)    | 7 (100)    | 1            | 38 (97)  | 13 (100) | 5 (100) | 4 (67) | 1    |
| Immunosuppressant                 | 23 (84)   | 24 (89)    | 6 (86)     | 0.9          | 33 (85)  | 11 (85)  | 5 (100) | 4 (67) | 1    |
| Cyclophosphamide                  | 19 (70)   | 21 (78)    | 5 (71)     | 0.9          | 26 (67)  | 11 (85)  | 5 (100) | 3 (50) | 0.4  |
| Rituximab                         | 5 (18.5)  | 10 (37)    | 0 (0)      | 0.1          | 8 (21)   | 6 (46)   | 0 (0)   | 1 (17) | 0.1  |
| Azithromycin                      | 8 (30)    | 2 (7)      | 2 (29)     | 0.09         | 10 (26)  | 1 (8)    | 1 (20)  | 0 (0)  | 0.4  |

\*: 2 patients are both anti-MPO (myeloperoxidase) and anti-BPI (bactericidal/permeability-increasing protein) positive

AAV, ANCA associated vasculitis; ANCA, antineutrophil cytoplasmic antibodies; B, bronchiectasis; BVAS, Birmingham Vasculitis Activity Score; EGPA, eosinophilic granulomatosis with polyangiitis; ENT, ear nose and throat; FFS, five factor score; GPA, granulomatosis with polyangiitis; IQR, interquartile range; MPA, microscopic polyangiitis; MPO, myeloperoxidase; PR3, proteinase 3.

**Supplementary Table 2. Respiratory findings at the diagnosis of bronchiectasis according to AAV subtypes and ANCA specificity**

|                                                   | MPA<br>(n=27)    | GPA<br>(n=27)    | EGPA<br>(n=7)    | p    | MPO<br>(n=39)    | PR3<br>(n=13)    | Negative<br>(n=5) | Other<br>(n=6)   | p-<br>value |
|---------------------------------------------------|------------------|------------------|------------------|------|------------------|------------------|-------------------|------------------|-------------|
| <b>Median age at B diagnosis, years, [IQR]</b>    | 59 [43-71.5]     | 56 [41.5-72]     | 60 [51.5-73]     | 0.7  | 56 [32-73]       | 60 [50-70]       | 60 [58-66]        | 51 [41.25-63.25] | 0.7         |
| <b>Respiratory manifestations, n (%)</b>          | 20 (74)          | 20 (74)          | 5 (71)           | 1    | 28 (72)          | 10 (77)          | 4 (80)            | 3 (50)           | 1           |
| Dyspnea                                           | 12 (44)          | 12 (44)          | 5 (71)           | 0.5  | 19 (49)          | 6 (46)           | 3 (60)            | 1 (17)           | 0.4         |
| Cough                                             | 16 (59)          | 12 (44)          | 4 (57)           | 0.6  | 20 (51)          | 6 (46)           | 3 (60)            | 3 (50)           | 0.7         |
| Hemoptysis                                        | 8 (30)           | 7 (26)           | 1 (14)           | 0.8  | 10 (26)          | 4 (31)           | 1 (20)            | 1 (17)           | 0.9         |
| <b>FACED score (0-7), median [IQR], (N=32)</b>    | 3 [2-4]          | 1.5 [1-4.5]      | 2 [1-4]          | 0.7  | 3 [2-5]          | 1 [0-1]          | 1 [1-3]           | 3 [3-4]          | 0.2         |
| <b>Bhalla's score (0-25), median [IQR] (N=53)</b> | 10 [8-12]        | 9 [6-12]         | 7 [5-8]          | 0.1  | 10 [7-12]        | 9 [6.25-9.75]    | 8 [4-8]           | 10 [5.5-13.5]    | 0.4         |
| <b>Other radiologic findings, n (%)</b>           |                  |                  |                  |      |                  |                  |                   |                  |             |
| Nodules                                           | 7 (26)           | 9 (33)           | 3(43)            | 0.6  | 12 (31)          | 5 (38)           | 1 (20)            | 1 (17)           | 0.6         |
| Nodule excavation                                 | 0 (0)            | 2 (7)            | 0 (0)            | 0.4  | 0 (0)            | 2 (16)           | 0 (0)             | 0 (0)            | 0.07        |
| Intra alveolar hemorrhage                         | 2 (7)            | 0 (0)            | 0 (0)            | 0.6  | 2 (5)            | 0 (0)            | 0 (0)             | 0 (0)            | 1           |
| Interstitial lung disease                         | 1 (3.5)          | 0 (0)            | 0 (0)            | 1    | 1(2.5)           | 0 (0)            | 0 (0)             | 0 (0)            | 1           |
| <b>Respiratory function</b>                       |                  |                  |                  |      |                  |                  |                   |                  |             |
| FEV1, ml median [IQR] (N=34)                      | 1430 [1097-2000] | 1810 [1170-2080] | 1090 [1070-2590] | 1    | 1500 [1090-2020] | 1780 [1315-1817] | 1200 [1060-1895]  | 1635 [1032-2185] | 1           |
| FEV1 %, median [IQR] (N=34)                       | 79 [59-88]       | 68 [61-75]       | 87 [54-104.75]   | 0.3  | 83 [59-93]       | 67 [63.5-70.75]  | 80 [64.25-102.75] | 67.5 [50-81]     | 0.5         |
| FEV1/FVC %, median [IQR] (N=40)                   | 73 [69-81]       | 66 [64-73]       | 67 [51.5-71.25]  | 0.1  | 73 [66.5-80]     | 64 [62-66]       | 68 [56.5-80.5]    | 68.5 [64.5-69]   | 0.2         |
| TPC ml, median [IQR] (N=31)                       | 4970 [4210-5340] | 6425 [4450-7225] | 5980 [5395-6700] | 0.05 | 5330 [4720-6340] | 5390 [3857-6787] | 5525 [5037-6012]  | 5200 [4810-6250] | 1           |
| TPC %, median [IQR] (N=31)                        | 91 [77-97]       | 97 [94-101]      | 119 [109-127.5]  | 0.01 | 97 [89-110]      | 93 [90.25-95.75] | 102 [101.5-102.5] | 100 [97-104.5]   | 0.6         |

AAV, ANCA associated vasculitis; EGPA, Eosinophilic Granulomatosis with Polyangiitis; FACED, FEV1, Age, Chronic colonization, Extension and Dyspnea; FVC, forced vital capacity; FEV1, forced expiratory volume; GPA, granulomatosis with polyangiitis; IQR, interquartile range; MPA, microscopic polyangiitis; MPO, myeloperoxidase; PR3, proteinase 3; TPC, total pulmonary capacity.

**Supplementary Table 3. Full detail of the Bhalla score at the diagnosis of bronchiectasis**

| First diagnosis                                                 | All (n=61) | B -AAV (n=25) | AAV-B (n=36) | p-value |
|-----------------------------------------------------------------|------------|---------------|--------------|---------|
| <b>Severity of bronchiectasis (0-3), n (%)</b>                  |            |               |              | 0.3     |
| 0-1 (absent to mild)                                            | 24 (45)    | 8 (35)        | 16 (53)      |         |
| 2-3 (moderate to severe)                                        | 29 (55)    | 15 (65)       | 14 (47)      |         |
| <b>Peribronchial thickening (0-3), n (%)</b>                    |            |               |              | 0.8     |
| 0-1 (absent to mild)                                            | 39 (74)    | 16 (70)       | 23 (77)      |         |
| 2-3 (moderate to severe)                                        | 14 (26)    | 7 (30)        | 7 (23)       |         |
| <b>Bronchiectasis extent (0-3), n (%)</b>                       |            |               |              | 0.3     |
| 0-1 (<6 BP segments)                                            | 26 (49)    | 9 (39)        | 17 (57)      |         |
| 2-3 (≥6 BP segments)                                            | 27 (51)    | 14 (61)       | 13 (43)      |         |
| <b>Mucous extension (0-3), n (%)</b>                            |            |               |              | 0.6     |
| 0-1 (<6 BP segments)                                            | 48 (91)    | 20 (87)       | 28 (93)      |         |
| 2-3 (≥6 BP segments)                                            | 5 (9)      | 3 (13)        | 2 (7)        |         |
| <b>Sacculation and abscesses (0-3), n (%)</b>                   |            |               |              | 0.07    |
| 0-1 (<6 BP segments)                                            | 50 (94)    | 20 (87)       | 30 (100)     |         |
| 2-3 (≥6 BP segments)                                            | 3 (6)      | 3 (13)        | 0 (0)        |         |
| <b>Generations of bronchial divisions involved (0-3), n (%)</b> |            |               |              | 1       |
| 0-1 (up to 4 <sup>th</sup> generation)                          | 7 (13)     | 3 (13)        | 4 (13)       |         |
| 2-3 (more than 4 <sup>th</sup> generation)                      | 46 (87)    | 20 (87)       | 26 (87)      |         |
| <b>Number of Bullae (0-3), n (%)</b>                            |            |               |              | 0.2     |
| 0 (absent)                                                      | 48 (91)    | 19 (83)       | 29 (97)      |         |
| 1-3 (unilateral, bilateral and >4)                              | 5 (5)      | 4 (17)        | 1 (3)        |         |
| <b>Emphysema (0-2), n (%)</b>                                   |            |               |              | 0.7     |
| 0 (absent)                                                      | 35 (66)    | 14 (61)       | 21 (70)      |         |
| 1 (1-5 BP segments)                                             | 14 (26)    | 7 (30)        | 7 (23)       |         |
| 2 (>5 BP segments)                                              | 4 (8)      | 2 (9)         | 2 (7)        |         |
| <b>Consolidation (0-2), n (%)</b>                               |            |               |              | 0.8     |
| 0 (absent)                                                      | 33 (62)    | 13 (57)       | 20 (67)      |         |
| 1 (subsegmental)                                                | 12 (23)    | 6 (26)        | 6 (20)       |         |
| 2 (segmental/lobar)                                             | 8 (15)     | 4 (17)        | 4 (13)       |         |

AAV, ANCA associated vasculitis; AAV-B, bronchiectasis post vasculitis; ANCA, antineutrophil cytoplasmic antibodies; B-AAV, bronchiectasis before vasculitis; BP, bronchopulmonary

**Supplementary Figure 1. Chest CT-scans of 3 patients with bronchiectasis occurring after onset of ANCA-associated vasculitis before (left panel) and after (right panel) immunosuppressive therapy.**

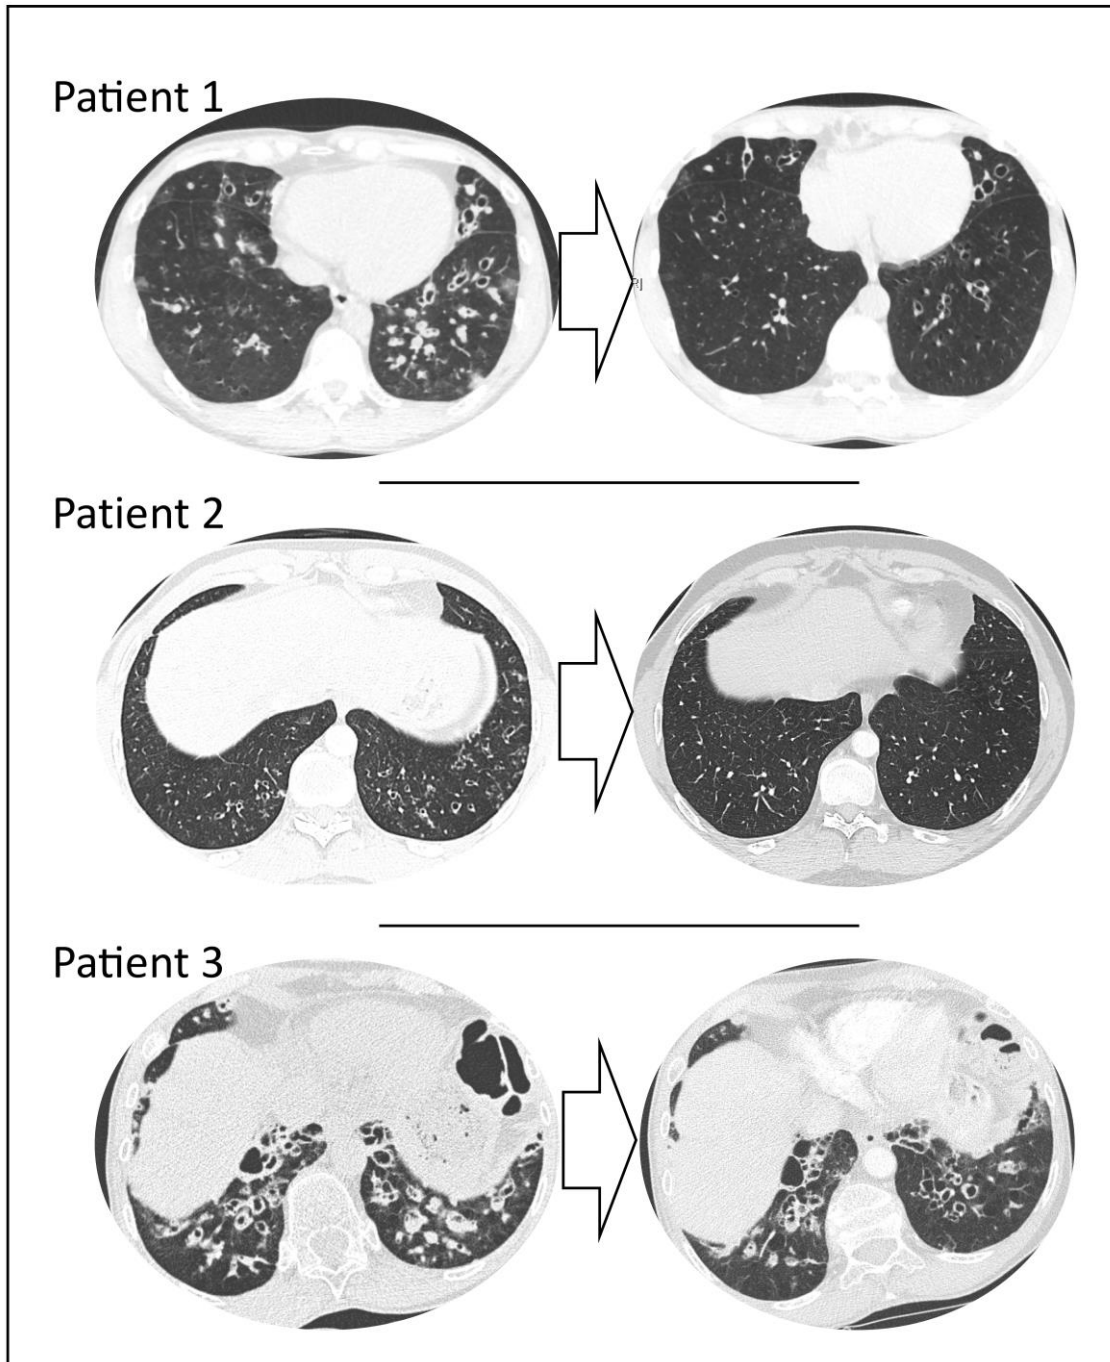

**Supplementary Table 4. Patients’ outcome according to AAV subtypes and ANCA specificity**

|                                                                 | MPA<br>(n=27) | GPA<br>(n=27) | EGP<br>A<br>(n=7) | P                       | MPO<br>(n=39) | PR3<br>(n=13)   | Negative<br>(n=5) | Other<br>(n=6) | p-<br>value |
|-----------------------------------------------------------------|---------------|---------------|-------------------|-------------------------|---------------|-----------------|-------------------|----------------|-------------|
| <b>AAV Follow-up (years), median [IQR]</b>                      | 5 [4-10]      | 10 [7-16]     | 3 [2-10]          | <b>0.00</b><br><b>7</b> | 6 [4-10]      | 10 [6-12]       | 3 [3-27]          | 18.5 [14-23]   | 0.08        |
| <b>Relapse of AAV, n (%)</b>                                    | 10 (37)       | 13 (48)       | 3 (43)            | 0.6                     | 15 (38)       | 6 (46)          | 2 (40)            | 3 (50)         | 0.6         |
| <b>Median number of AAV relapses [IQR]</b>                      | 0 [0-1]       | 0 [0-2]       | 0 [0-1]           | 0.4                     | 0 [0-1]       | 0 [0-2]         | 0 [1]             | 1 [0.75-1.75]  | 0.4         |
| <b>Death, n (%)</b>                                             | 8 (30)        | 1 (4)         | 0 (0)             | <b>0.02</b>             | 7 (22)        | 1 (8)           | 0 (0)             | 1 (17)         | 0.5         |
| <b>Overall survival during AAV follow-up</b>                    |               |               |                   |                         |               |                 |                   |                |             |
| 5 years, %                                                      | 86            | 100           | 100               |                         | 95            | 100             | 100               | 100            |             |
| 10 years, %                                                     | 56            | 92            | 100               |                         | 81            | 75              | -                 | -              |             |
| <b>Median absolute variation of Ballah’s score, point [IQR]</b> | 1 [0-4]       | 2 [0-6]       | 1 [0-11]          | 0.83                    | 3 [0-2.5]     | 0.5 [-1 – 2.25] | 5.5 [2.75-8.25]   | 0 [-0.5 - 0.5] | 0.4         |
| <b>Variation of Bhalla’s score, n (%) (N=37)</b>                |               |               |                   | 1                       |               |                 |                   |                | 0.9         |
| Degradation                                                     | 11 (58)       | 9 (60)        | 2 (67)            |                         | 16 (64)       | 4 (50)          | 1 (50)            | 1 (50)         |             |
| Stability                                                       | 5 (26)        | 3 (20)        | 1 (33)            |                         | 7 (28)        | 1 (12.5)        | 1 (50)            | 0 (0)          |             |
| Improvement                                                     | 3 (16)        | 3 (20)        | 0 (0)             |                         | 2 (8)         | 3 (37.5)        | 0 (0)             | 1 (50)         |             |
| <b>Median annual infection rate [IQR], (N=16)</b>               | 0.1 [0-0.7]   | 0.2 [0-0.4]   | 0 [0-0.2]         | 0.5                     | 0 [0-0.4]     | 0.2 [0-0.3]     | 0.2 [0-0.55]      | 0.45 [0.2-0.8] | 0.7         |
| <b><i>Pseudomonas aeruginosa</i>’s colonization, n (%)</b>      | 9 (33)        | 8 (29.5)      | 1 (14)            | 0.8                     | 9 (23)        | 5 (38)          | 2 (40)            | 2 (33)         | 0.4         |

AAV, ANCA-associated vasculitis; ANCA, antineutrophil cytoplasmic antibodies; EGPA, Eosinophilic Granulomatosis with Polyangiitis; GPA, granulomatosis with polyangiitis; IQR, interquartile range; MPA, microscopic polyangiitis; MPO, myeloperoxidase; PR3, proteinase 3.
